# Supplementary material
Source: publisher figshare collection journal article supplement (https://acs.figshare.com/ndownloader/files/3726856)
Supplement: Supplementary file 1 [file 3726856]

## Supporting Information

### Highly Luminescent Nitrogen Doped Carbon Dots and Their Protective Effect against Oxidative Stress on Cells

Zi-Qiang Xu,<sup>†,‡,§</sup> Jia-Yi Lan,<sup>†,§</sup> Jian-Cheng Jin,<sup>†</sup> Ping Dong,<sup>†</sup> Feng-Lei Jiang,<sup>\*,†</sup> and Yi Liu<sup>\*,†</sup>

<sup>†</sup>State Key Laboratory of Virology & Key Laboratory of Analytical Chemistry for Biology and Medicine (MOE), College of Chemistry and Molecular Sciences, Wuhan University, Wuhan 430072, P. R. China

<sup>‡</sup>Hubei Collaborative Innovation Center for Advanced Organic Chemical Materials, Ministry-of-Education Key Laboratory for the Green Preparation and Application of Functional Materials, Hubei Province Key Laboratory of Industrial Biotechnology, Hubei Key Laboratory of Polymer Materials, Faculty of Materials Science & Engineering, Hubei University, Wuhan 430062, P. R. China

## **Table of contents in supporting information**

1. Reaction conditions for the preparation of other C-dots (Table S1)
2. Effects of CA/Tris ratio and reaction time on the QY of C-dots (Figure S1)
3. Size distribution of C-dots (Figure S2)
4. XRD pattern for the as-prepared C-dots (Figure S3)
5. FL decays curves of the C-dots (Figure S4)
6. Viability of the SGC-7901 or GES-1 cells after incubation with C-dots (Figure S5)
7. Total intracellular SOD incubated with different concentrations of C-dots (Figure S6)

Table S1 Other reaction conditions for the preparation of C-dots

| Serial | Raw Materials       |                    | QY (%) | $\lambda_{em}$ (nm) |
|--------|---------------------|--------------------|--------|---------------------|
| CD1    | Sucrose             | ——                 | 3.1    | 517.0               |
| CD2    | Sucrose             | H <sub>2</sub> MSA | 5.5    | 544.6               |
| CD3    | Sucrose             | NAC                | 6.6    | 523.6               |
| CD4    | Sucrose             | AchCl              | 2.0    | 528.0               |
| CD5    | Sucrose             | Tris               | 11.3   | 450.0               |
| CD6    | CA·H <sub>2</sub> O | Tris               | 52.0   | 430.0               |
| CD7    | CA·H <sub>2</sub> O | NAC                | 47.1   | 425.0               |

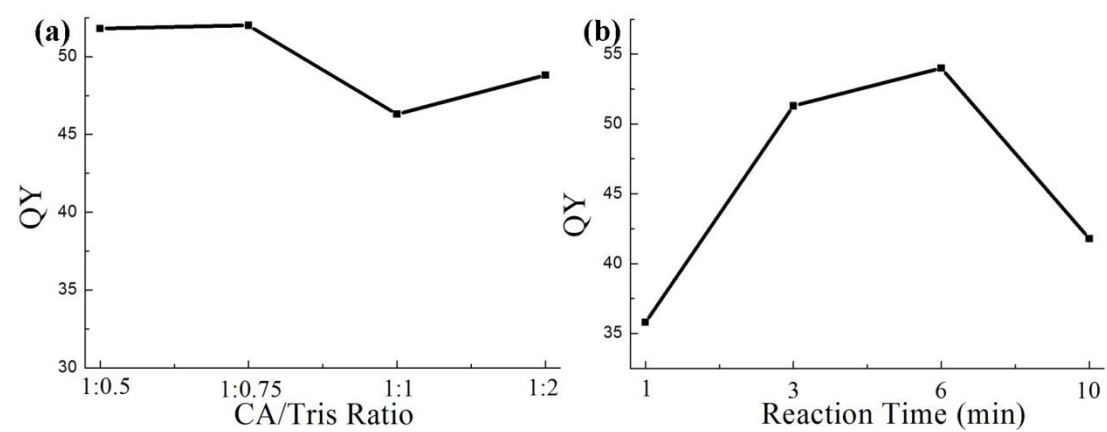

Figure S1 Effects of CA/Tris ratio (a) and reaction time (b) on the QY of C-dots.

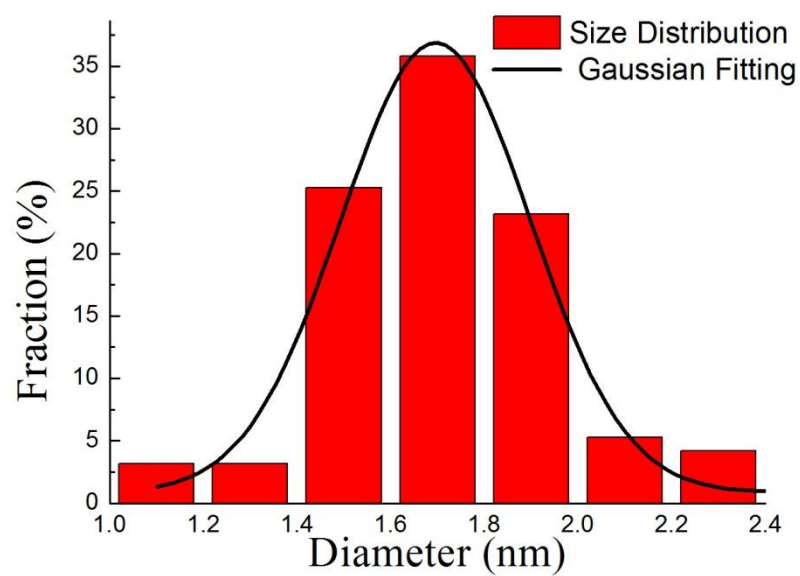

Figure S2 Size distribution of C-dots. 200 particles were counted for statistic analysis.

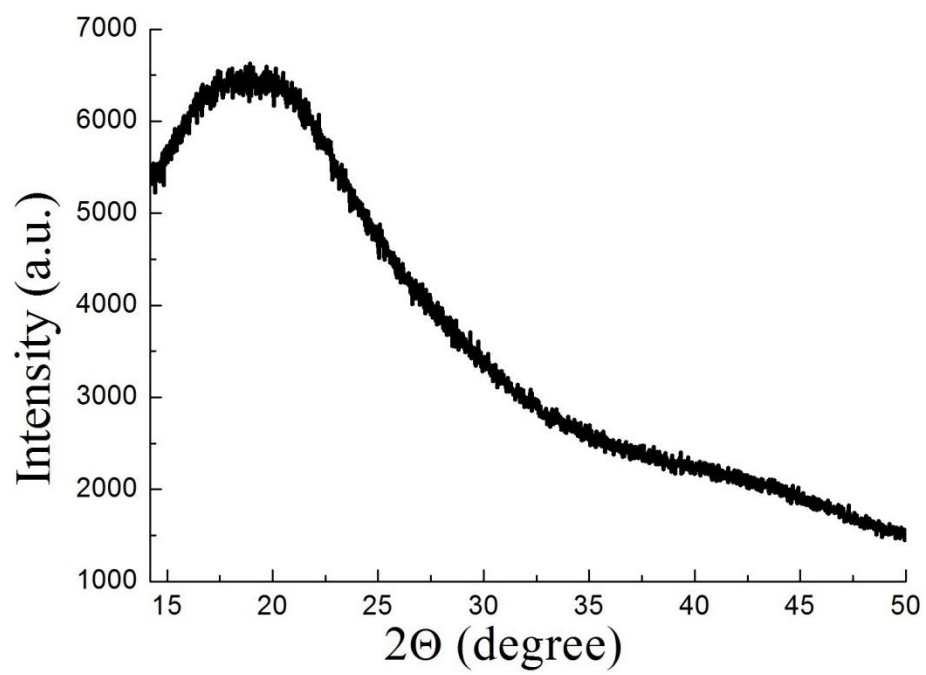

Figure S3. XRD pattern for the as-prepared C-dots.

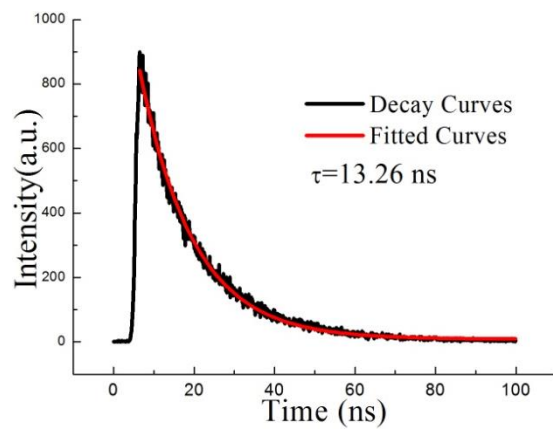

Figure S4. FL decays curves (330 nm laser excitation, and monitored through 430 nm band pass filter) of the C-dots.  $I(t) = \alpha_1 \exp(-t/\tau) + b$

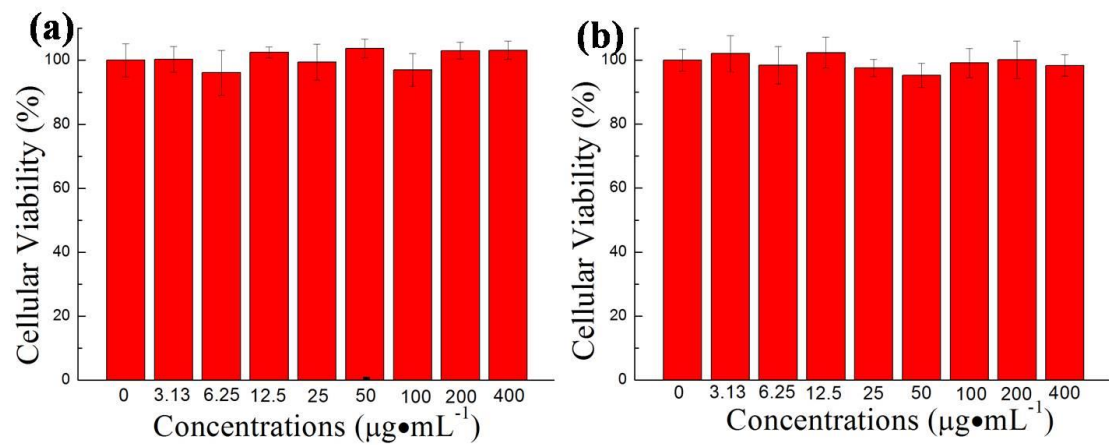

Figure S5. Viability of the SGC-7901 (a) or GES-1 cells (b) after 48 h incubation with the C-dots (mean  $\pm$  S.D,  $n=4$ ).



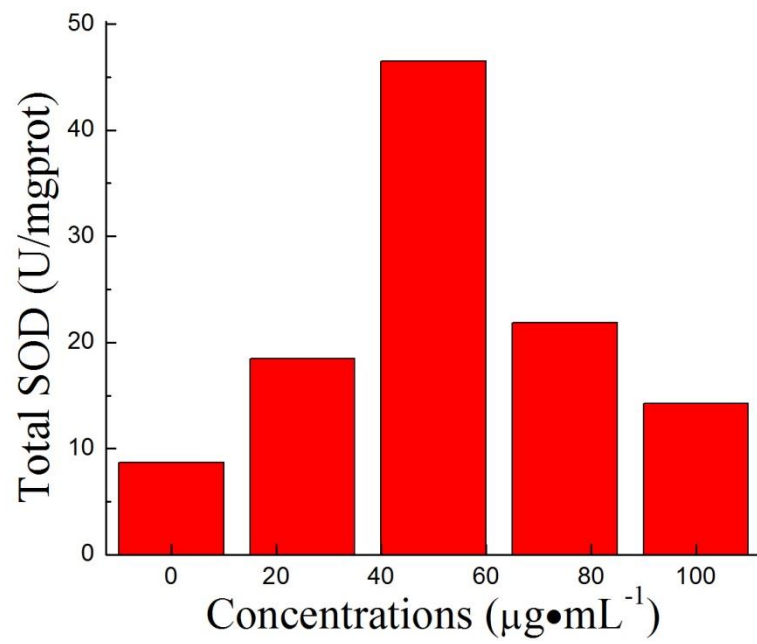

Figure S6. Total intracellular SOD incubated with different concentrations of C-dots.
